# Supplementary material
Source: PubMed Central journal article supplement (PMC4768313)
Supplement: NIHMS755241-supplement-2.pdf [file NIHMS755241-supplement-2.pdf]

## Supplemental Figures and Legends

**A.**

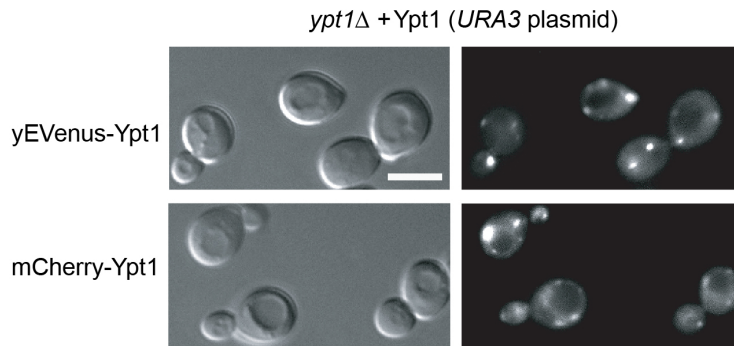

**D.**

| Puncta per cell     | # of cells (n) | # of puncta average | std dev |
|---------------------|----------------|---------------------|---------|
| yEVenus-Ypt1        | 10             | 10.3                | 2       |
| yEGFP-YPT31 /ypt32Δ | 10             | 11.5                | 2       |

**B.**

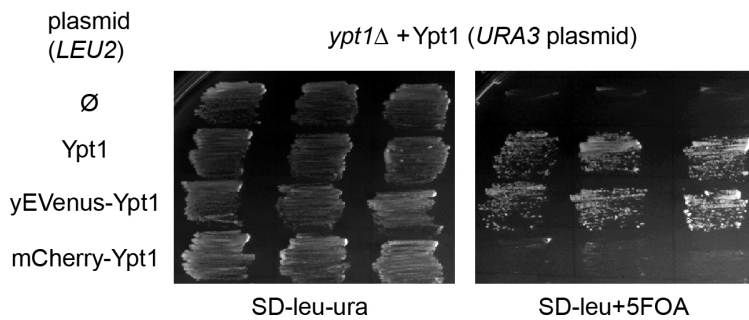

**C.**

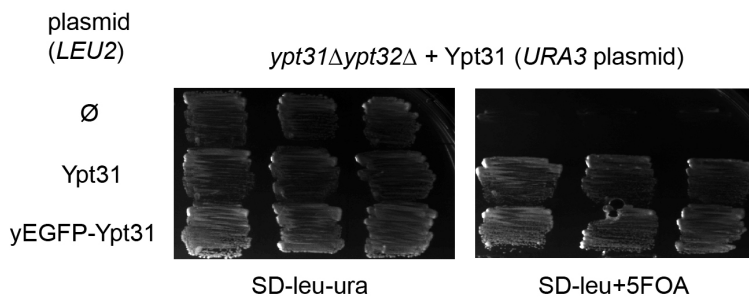

**Figure S1. Functionality of fluorescently tagged Ypt1 and Ypt31 (Related to Figures 2-4).** **A.** Both yEVenus-Ypt1 and mCherry-Ypt1 show punctate fluorescence signal. Cells expressing the fluorescently tagged Ypt1 proteins from a *CEN* plasmid were visualized by live-cell microscopy. Shown are: DIC (left) and yEVenus-Ypt1 or mCherry-Ypt1 (right). Bar 5 μm. **B.** yEVenus-Ypt1, but not mCherry-Ypt1, is functional as a sole copy. Cells carrying *ypt1Δ* on the chromosome and expressing *YPT1* from a *CEN URA3* plasmid were transformed with a *CEN LEU2* plasmid expressing Ypt1 from its own promoter and terminator (from top to bottom): ∅ (empty vector control), Ypt1, yEVenus-Ypt1 (Ypt1 tagged at its N-terminus with yeast-codon-optimized enhanced Venus), or mCherry-Ypt1. Growth of transformants is shown on SD-Ura-Leu (left), and the ability of cells to lose the *URA3* plasmid is shown on SD-Leu+5FOA (right). Whereas Ypt1 and yEVenus-Ypt1 are functional, mCherry-Ypt1 is not. **C.** yEGFP-Ypt31 is functional as a sole copy. Cells carrying *ypt31Δypt32Δ* on the chromosome and expressing *YPT31* from a *CEN URA3* plasmid were transformed with a *CEN LEU2* plasmid expressing Ypt31 from its own promoter and terminator (from top to bottom): ∅ (empty vector control), Ypt31, yEGFP-Ypt31 (Ypt31 tagged at its N-terminus with yeast-codon-optimized enhanced GFP). Growth of transformants is shown on SD-Ura-Leu (left), and the ability to lose the *URA3* plasmid is shown on SD-Leu+5FOA (right). Both Ypt31 and yEGFP-Ypt31 can support cell growth. Results shown in this figure represent at least two independent experiments. **D.** Table shows quantifications from two independent experiments of total number of puncta of Ypt1 and Ypt31 per cell by live-cell microscopy.

### A. Sec7 and Chc1 (yEGFP/mRFP)

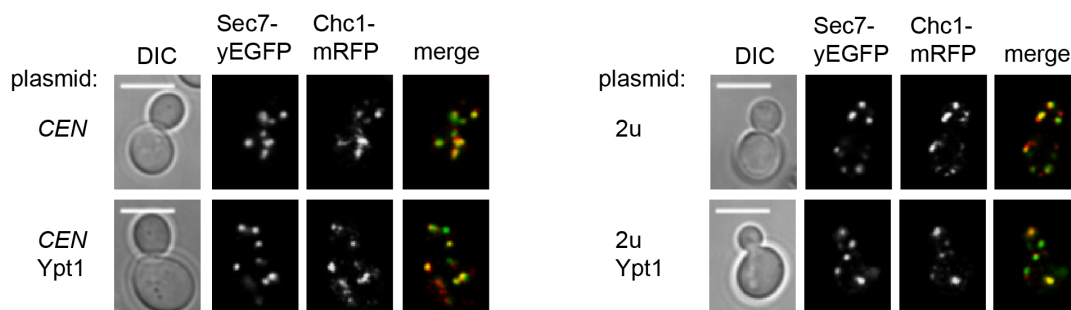

### B. Sec7 and Chc1 (mRFP/GFP)

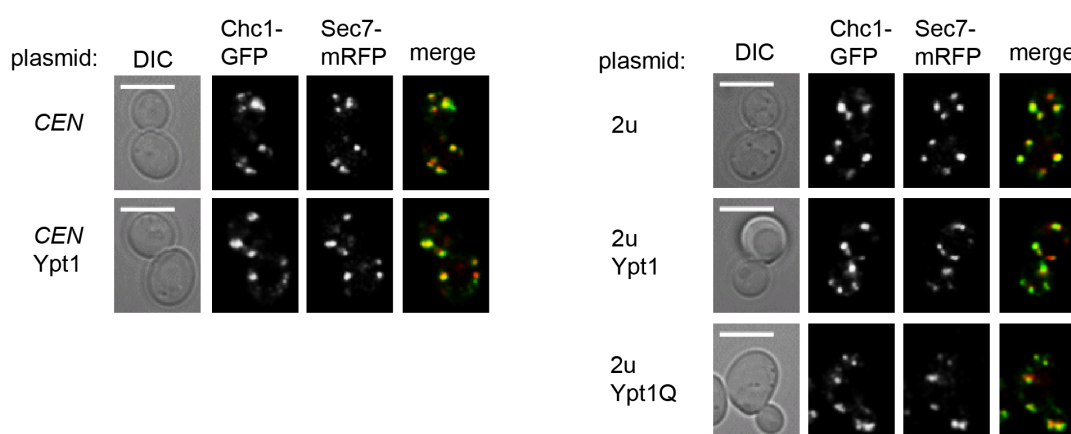

### C.

| Strain                  | Plasmid         | # of cells (n) | co-localization (%) of Green with Red | std dev | # Green puncta/slice | std dev | # co-localized puncta/slice | # not co-localized puncta/slice | std dev |
|-------------------------|-----------------|----------------|---------------------------------------|---------|----------------------|---------|-----------------------------|---------------------------------|---------|
| Cop1-mRFP<br>Sec7-yEGFP | ∅ <i>CEN</i>    | 20             | 18.5                                  | 1       | 4.3                  | 0.1     | 0.9                         |                                 |         |
|                         | Ypt1 <i>CEN</i> | 20             | 31.2                                  | 1       | 3.8                  | 0.6     | 1.1                         |                                 |         |
|                         | ∅ 2μ            | 20             | 18.7                                  | 1       | 4.3                  | 0.2     | 0.9                         |                                 |         |
|                         | Ypt1 2μ URA3    | 20             | 42.6                                  | 1       | 3.6                  | 0.2     | 1.4                         |                                 |         |
|                         | Ypt1 2μ LEU2    | 30             | 40                                    | 0       | 4                    | 0.2     | 1.5                         |                                 |         |
|                         | Ypt1-GTP 2μ     | 30             | 55                                    | 6       | 4.7                  | 0.2     | 2.5                         |                                 |         |
| Sec7-mRFP<br>Chc1-GFP   | ∅ <i>CEN</i>    | 28             | 78.8                                  | 3       | 5.2                  |         | 4                           | 1.2                             | 0.4     |
|                         | Ypt1 <i>CEN</i> | 28             | 75.1                                  | 4       | 5.6                  |         | 4.1                         | 1.5                             | 0.3     |
|                         | ∅ 2μ            | 28             | 64.5                                  | 3       | 5.6                  |         | 3.6                         | 2.1                             | 0.2     |
|                         | Ypt1 2μ         | 28             | 78.8                                  | 3       | 5.4                  |         | 4.1                         | 1.3                             | 0.1     |
|                         | Ypt1-GTP 2μ     | 28             | 83.5                                  | 3       | 5.4                  |         | 4.4                         | 1                               | 0.2     |
| Sec7-yEGFP<br>Chc1-mRFP | ∅ <i>CEN</i>    | 20             | 88.5                                  | 3       | 4.2                  |         | 3.6                         | 0.6                             |         |
|                         | Ypt1 <i>CEN</i> | 20             | 91                                    | 4       | 3.7                  |         | 3.3                         | 0.4                             |         |
|                         | ∅ 2μ            | 20             | 88.9                                  | 0       | 3.6                  |         | 3.1                         | 0.5                             |         |
|                         | Ypt1 2μ         | 20             | 89.5                                  | 5       | 3.9                  |         | 3.5                         | 0.4                             |         |

**Figure S2. Ypt1 overexpression does not affect Sec7 and Chc1 co-localization (Related to Figures 6-7).** **A.** Cells expressing Sec7-yEGFP and Chc1-mRFP from their endogenous loci were transformed with *CEN* (left) and 2m (right) plasmids, empty (top) and for overexpression of Ypt1 (bottom). Information from this experiment was used in Figure 7E. **B.** Cells expressing Sec7-mRFP and Chc1-yEGFP from their endogenous loci were transformed with *CEN* (left) and 2m (right) plasmids, empty (top) and for overexpression of Ypt1 (bottom). **C.** Table shows quantifications from two independent experiments for panels A and B of this figure and Figures 6 and 7. The co-localization level of the two markers was determined using live cell microscopy. Bar, 5μm.

### A. Cop1 and Sec7

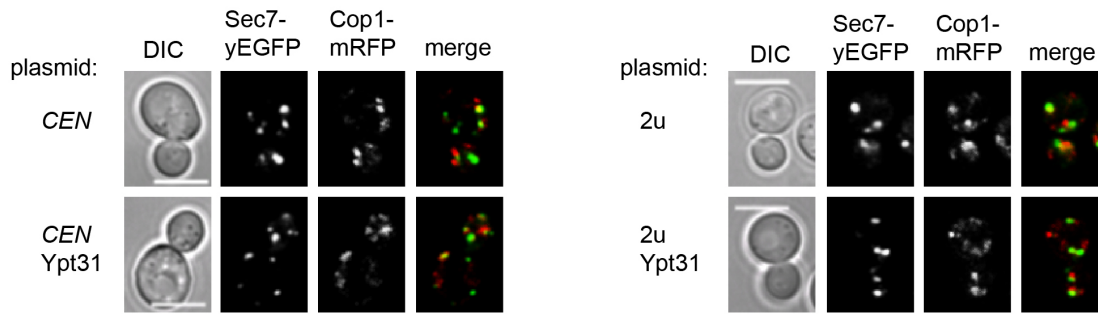

### B. Sec7 and Chc1

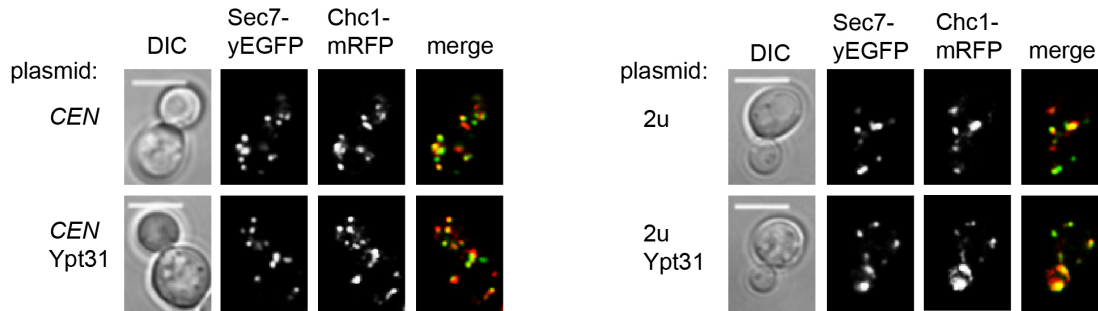

### C.

| Strain                  | Plasmid          | # of cells (n) | co-localization (%) of Green with Red | std dev | # Green puncta/slice | std dev | # co-localized puncta/slice | # not co-localized puncta/slice | std dev |
|-------------------------|------------------|----------------|---------------------------------------|---------|----------------------|---------|-----------------------------|---------------------------------|---------|
| Cop1-mRFP<br>Sec7-yEGFP | ∅ <i>CEN</i>     | 20             | 14.3                                  | 5       | 4.6                  | 0.2     | 0.7                         |                                 |         |
|                         | Ypt31 <i>CEN</i> | 20             | 20.1                                  | 3       | 4.5                  | 0.6     | 0.9                         |                                 |         |
|                         | ∅ 2μ             | 20             | 18.7                                  | 1       | 4.3                  | 0.2     | 0.9                         |                                 |         |
|                         | Ypt31 2μ         | 20             | 19.5                                  | 3       | 4.2                  | 0.1     | 0.8                         |                                 |         |
| Sec7-mRFP<br>Chc1-GFP   | ∅ <i>CEN</i>     | 20             | 81.1                                  | 1       | 5.2                  |         | 4.1                         | 1.1                             | 0       |
|                         | Ypt31 <i>CEN</i> | 20             | 70.5                                  | 3       | 6.3                  |         | 4.5                         | 1.9                             | 0       |
|                         | ∅ 2μ             | 28             | 64.5                                  | 3       | 5.6                  |         | 3.6                         | 2.1                             | 0.2     |
|                         | Ypt31 2μ         | 28             | 64.4                                  | 4       | 6.3                  |         | 4                           | 2.3                             | 0.3     |
|                         | Ypt31-GTP 2μ     | 28             | 45.1                                  | 3       | 8.4                  |         | 3.6                         | 4.9                             | 0.4     |
| Sec7-yEGFP<br>Chc1-mRFP | ∅ <i>CEN</i>     | 20             | 90.9                                  | 1       | 4                    |         | 3.6                         | 0.4                             |         |
|                         | Ypt31 <i>CEN</i> | 20             | 90.3                                  | 3       | 4.5                  |         | 4.1                         | 0.4                             |         |
|                         | ∅ 2μ             | 20             | 88.9                                  | 0       | 3.6                  |         | 3.1                         | 0.5                             |         |
|                         | Ypt31 2μ         | 20             | 88                                    | 4       | 4.4                  |         | 3.9                         | 0.5                             |         |

**Figure S3. Effects of Ypt31 overexpression on co-localization of Golgi markers. (Related to Figures 6-7).**

**A.** Overexpression of Ypt31 does not affect the level of co-localization of Cop1 and Sec7. Cells expressing Sec7-yEGFP and Cop1-mRFP from their endogenous loci were transformed with *CEN* (left) and 2μ (right) plasmids, empty (top) and for overexpression of Ypt31 (bottom). Information from this experiment was used in [Figure 6E-F](#).

**B.** Overexpression of Ypt31 does not affect the level of co-localization of Sec7 with Chc1. Cells expressing Sec7-yEGFP and Chc1-mRFP from their endogenous loci were transformed with *CEN* (left) and 2μ (right) plasmids, empty (top) and for overexpression of Ypt31 (bottom).

**C.** Table shows quantifications from two independent experiments for panels A and B of this figure and [Figures 6 and 7](#). The co-localization level of the two markers was determined using live cell microscopy. Bar, 5μm.

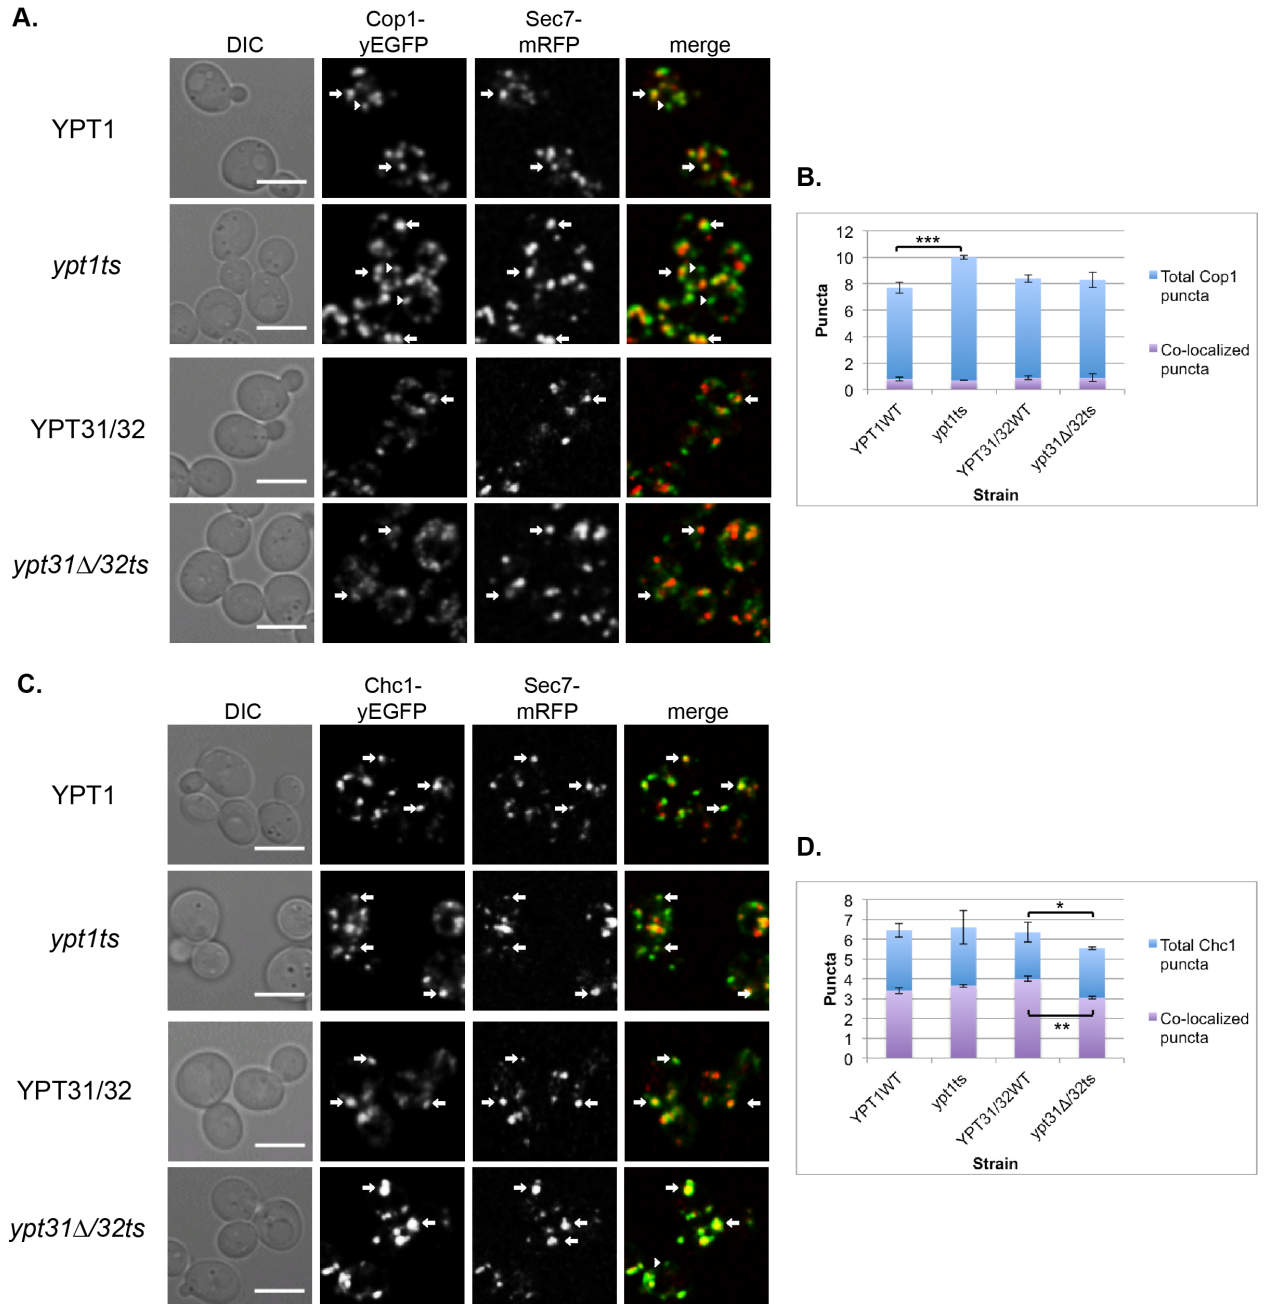

**Figure S4. The effect of *ypt1* and *ypt31/32* loss-of-function mutations on the co-localization of Golgi markers. (Related to Figures 6-7).** The effect of *ypt1ts* and *ypt31Δ/32ts* mutations on the co-localization of Golgi markers was determined at the permissive temperature using live-cell fluorescence microscopy: **A-B.** Cop1-Sec7. **C-D.** Sec7-Chc1. Wild type and mutant cells expressing tagged Golgi markers from their endogenous promoters were analyzed as described for Figures 6-7. Panels A and C: Shown from top to bottom: WT (*YPT1*), *ypt1ts*, WT (*YPT31/YPT32*), *ypt31Δ/32ts*. Arrows show co-localization; arrowheads show green-only puncta. Bar, 5μm. Bar graphs showing the number of Cop1 (B) or Chc1 (D) puncta: Total puncta (blue+purple bars), and puncta that co-localize with Sec7 (purple bars). Error bars and +/- represent STDEV; brackets with stars represent p-value from significant (\*) to highly significant (\*\*); p-values of all other pairs were not significant. Quantifications from two independent experiments are detailed in [Table S2](#).

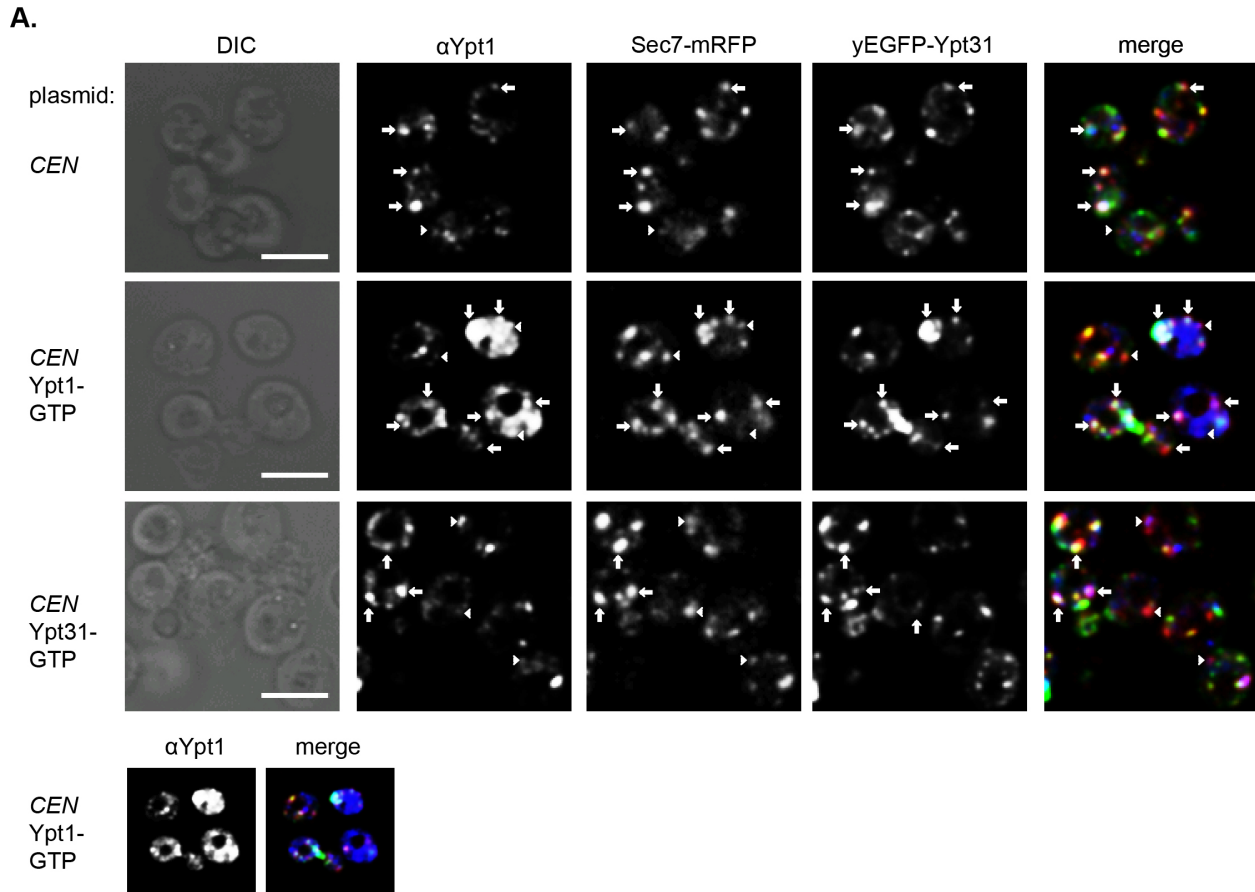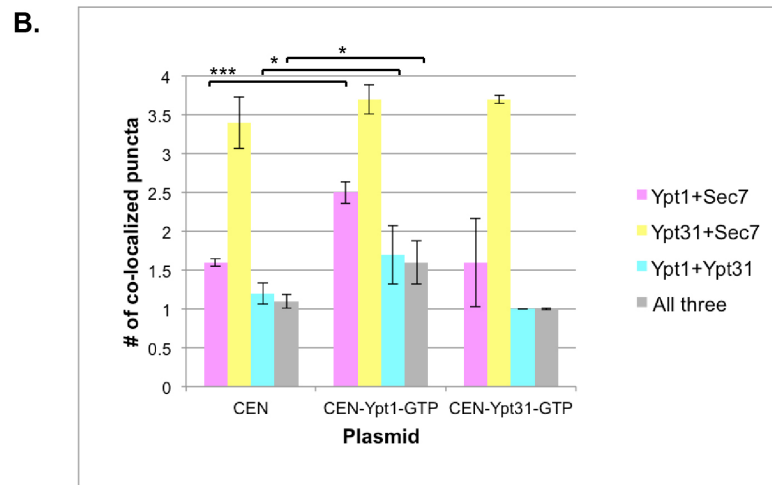

**Figure S5. The effect of Ypt1 or Ypt31 activation on their co-localization at the Sec7-marked Golgi compartment (Related to Figure 6-7).** **A.** Cells were transformed with a CEN plasmid: empty (top), expressing Ypt1-GTP (middle), or Ypt31-GTP (bottom). Three-color IF microscopy was done as described in the legend for Figure 5C. The brightness of the Ypt1 staining in cells overexpressing Ypt1-GTP was reduced to enable the co-localization analysis (two bottom panels show the cells before the adjustment). Bar, 5 $\mu$ m. **B.** Bar graph showing the number of puncta in transformants of the three plasmids (from left-to-right): empty (CEN), Ypt1-GTP and Ypt31-GTP. The effect of each plasmid on co-localization of two or three proteins is color-coded (see key on the right): Ypt1+Sec7 (pink), Ypt31+Sec7 (yellow), Ypt1+Ypt31 (blue), and all three proteins (grey). Error bars and +/- represent STDEV; brackets with stars represent p-value; p-values for all other pairs were not significant. Quantifications from two independent experiments are detailed in [Table S3](#).

**A.** Sec7-mRFP  
Cop1-eGFP  
Merge

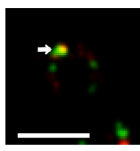

2 $\mu$

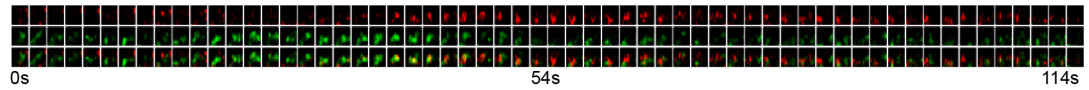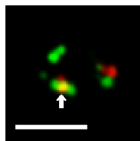

2 $\mu$  Ypt1-GTP

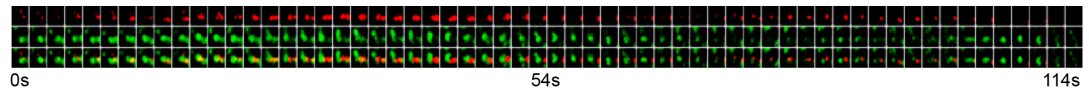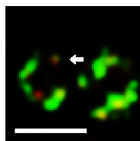

2 $\mu$  Ypt31-GTP

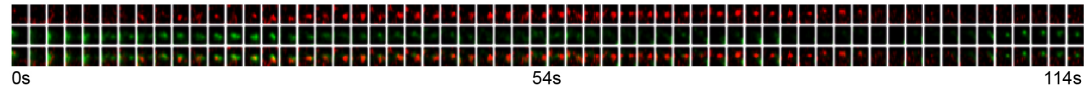

**B.** Sec7-mRFP  
Chc1-eGFP  
Merge

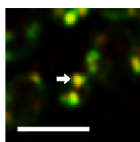

2 $\mu$

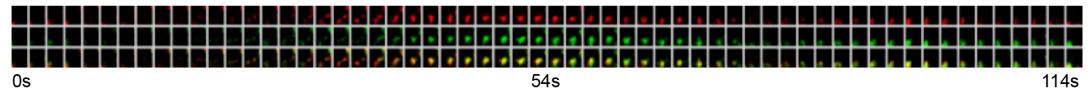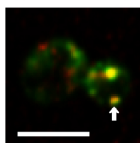

2 $\mu$  Ypt1-GTP

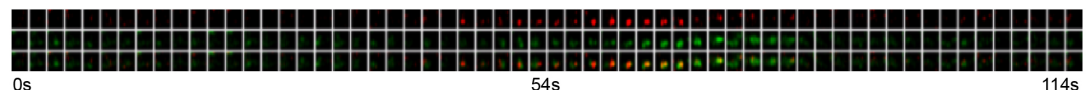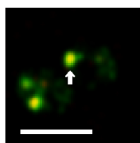

2 $\mu$  Ypt31-GTP

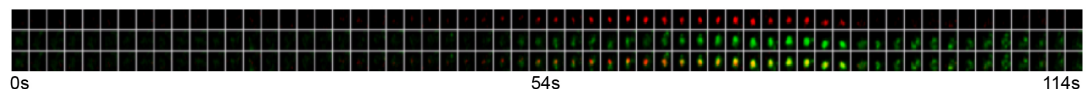

**Figure S6. The effect of overexpression of activated Ypt1 and Ypt31 on Golgi cisternal progression. (Related to Figure 8)** Three-channel kymographs of puncta used for graphs shown in Figure 8A-F. **A-C:** Cop1-GFP and Sec7-mRFP. **D-F:** Sec7-mRFP and Chc1-GFP. Cells expressing a Golgi marker pair were transformed with one of the indicated 2m plasmids: empty, YPT1-GTP or Ypt31-GTP. For each transformant, left panel shows a merged live-cell image with a white arrow pointing to the punctum selected for the kymograph, which is shown to its right. For each kymograph, shown from top-to-bottom: mRFP, GFP, merge, time (secs). Bar, 5 $\mu$ m.

## Supplemental Tables

**Table S1. Distribution of Ypt1 on the Golgi using three-color IF microscopy (Related to Figure 3).**

|                                           |                |                                            |         |                             |                             |                                            |         |                             |
|-------------------------------------------|----------------|--------------------------------------------|---------|-----------------------------|-----------------------------|--------------------------------------------|---------|-----------------------------|
| Cop1-mRFP<br>Sec7-yEGFP<br>$\alpha$ -Ypt1 | # of cells (n) | co-localization (%) of Sec7 with Ypt1      | std dev | # Sec7 puncta/slice         | # co-localized puncta/slice | co-localization (%) of Ypt1 with Sec7      | std dev | # Ypt1 puncta/slice         |
|                                           | 24             | 33.1                                       | 3       | 5                           | 1.5                         | 23.4                                       | 2       | 6.6                         |
|                                           |                | co-localization (%) of Sec7 with Cop1      | std dev | # co-localized puncta/slice |                             | co-localization (%) of Ypt1 with Cop1      | std dev | # co-localized puncta/slice |
|                                           | 14.7           | 0                                          | 0.7     |                             | 54.2                        | 6                                          | 3.4     |                             |
| co-localization of three markers          | # of cells (n) | co-localization (%) of Ypt1+Sec7 with Cop1 | std dev |                             | # of cells (n)              | co-localization (%) of Cop1+Sec7 with Ypt1 | std dev |                             |
|                                           | 20             | 46.7                                       | 7       |                             | 14                          | 93.8                                       | 9       |                             |
| Chc1-mRFP<br>Sec7-yEGFP<br>$\alpha$ -Ypt1 | # of cells (n) | co-localization (%) of Sec7 with Ypt1      | std dev | # Sec7 puncta/slice         | # co-localized puncta/slice | co-localization (%) of Ypt1 with Sec7      | std dev | # Ypt1 puncta/slice         |
|                                           | 24             | 32.3                                       | 1       | 4.5                         | 1.4                         | 23                                         | 2       | 6.3                         |
|                                           |                | co-localization (%) of Sec7 with Chc1      | std dev | # co-localized puncta/slice |                             | co-localization (%) of Ypt1 with Chc1      | std dev | # co-localized puncta/slice |
|                                           | 58.2           | 3                                          | 2.6     |                             | 11.9                        | 4                                          | 0.66    |                             |
| co-localization of three markers          | # of cells (n) | co-localization (%) of Ypt1+Chc1 with Sec7 | std dev |                             | # of cells (n)              | co-localization (%) of Ypt1+Sec7 with Chc1 | std dev |                             |
|                                           | 12             | 100                                        | 0       |                             | 19                          | 60.3                                       | 3       |                             |

**Table S2. The effect of *ypt1* and *ypt31/32* loss-of-function mutations on the co-localization of Golgi markers (Related to Figure S4).**

|                       | Strain                               | # of cells (n) | co-localization (%) of green with Sec7 | std dev | # green puncta/slice | std dev    | p-value          | # co-localized puncta/slice | std dev    | p-value         |
|-----------------------|--------------------------------------|----------------|----------------------------------------|---------|----------------------|------------|------------------|-----------------------------|------------|-----------------|
| Sec7-mRFP<br>Chc1-GFP | YPT1                                 | 20             | 11.1                                   | 2       | <b>7.7</b>           | <b>0.4</b> | n/a              | <b>0.8</b>                  | <b>0.1</b> |                 |
|                       | <i>ypt1ts</i>                        | 20             | 7.8                                    | 1       | <b>10.0</b>          | <b>0.1</b> | <b>0.0007***</b> | <b>0.7</b>                  | <b>0</b>   |                 |
|                       | YPT31/32                             | 20             | 11.9                                   | 1       | <b>8.4</b>           | <b>0.3</b> | n/a              | <b>0.9</b>                  | <b>0.1</b> |                 |
|                       | <i>ypt31<math>\Delta</math>/32ts</i> | 20             | 11.0                                   | 4       | <b>8.3</b>           | <b>0.6</b> | <b>0.8297</b>    | <b>0.9</b>                  | <b>0.3</b> |                 |
| Sec7-mRFP<br>Cop1-GFP | YPT1                                 | 20             | 54.9                                   | 1       | <b>6.5</b>           | <b>0.4</b> | n/a              | <b>3.4</b>                  | <b>0.1</b> |                 |
|                       | <i>ypt1ts</i>                        | 20             | 56.8                                   | 1       | <b>6.6</b>           | <b>0.8</b> | <b>0.7318</b>    | <b>3.7</b>                  | <b>0.1</b> | <b>0.0374*</b>  |
|                       | YPT31/32                             | 20             | 63.6                                   | 7       | <b>6.4</b>           | <b>0.5</b> | n/a              | <b>4.0</b>                  | <b>0.1</b> |                 |
|                       | <i>ypt31<math>\Delta</math>/32ts</i> | 20             | 56.6                                   | 3       | <b>5.6</b>           | <b>0.1</b> | <b>0.0395*</b>   | <b>3.1</b>                  | <b>0.1</b> | <b>0.0042**</b> |

Bolded numbers were used for graphs in Figure S4B,D.

**Table S3. The effect of Ypt1 or Ypt31 activation on their co-localization at the Sec7-marked Golgi compartment (Related to Figure S5)**

| <i>yEGFP-YPT31/ypt32Δ</i><br>Sec7-mRFP<br>α-Ypt1 |     | # of<br>Ypt1+Ypt31<br>puncta | % coloc<br>Ypt1 with<br>Ypt31 | % coloc<br>Ypt31 with<br>Ypt1 | # of<br>Ypt1+Sec7<br>puncta | % coloc<br>Ypt1 with<br>Sec7 | % coloc<br>Sec7 with<br>Ypt1 | # of<br>Ypt31+Sec7<br>puncta | % coloc<br>Ypt31 with<br>Sec7 | % coloc<br>Sec7 with<br>Ypt31 |
|--------------------------------------------------|-----|------------------------------|-------------------------------|-------------------------------|-----------------------------|------------------------------|------------------------------|------------------------------|-------------------------------|-------------------------------|
| CEN<br>n=30                                      | ave | 1.17                         | 0.20                          | 0.20                          | 1.57                        | 0.28                         | 0.35                         | 3.43                         | 0.57                          | 0.77                          |
|                                                  | ±   | 0.14                         | 0.02                          | 0.04                          | 0.05                        | 0.02                         | 0.00                         | 0.33                         | 0.05                          | 0.09                          |
| CEN-Ypt1-GTP<br>n=30                             | ave | 1.73                         | 0.29                          | 0.27                          | 2.50                        | 0.43                         | 0.54                         | 3.73                         | 0.60                          | 0.81                          |
|                                                  | ±   | 0.38                         | 0.04                          | 0.07                          | 0.14                        | 0.02                         | 0.04                         | 0.19                         | 0.02                          | 0.02                          |
|                                                  |     | <b>p=0.0240</b>              |                               |                               | <b>p=0.0006</b>             |                              |                              | <b>p=0.3474</b>              |                               |                               |
| CEN-Ypt31-GTP<br>n=30                            | ave | 1.00                         | 0.16                          | 0.16                          | 1.60                        | 0.28                         | 0.40                         | 3.70                         | 0.61                          | 0.83                          |
|                                                  | ±   | 0.00                         | 0.01                          | 0.01                          | 0.57                        | 0.11                         | 0.17                         | 0.05                         | 0.06                          | 0.02                          |
|                                                  |     | <b>p=0.4038</b>              |                               |                               | <b>p=0.8926</b>             |                              |                              | <b>p=0.3934</b>              |                               |                               |

| <i>yEGFP-YPT31/ypt32Δ</i><br>Sec7-mRFP<br>α-Ypt1 |     | # of red<br>Sec7 | # of green<br>Ypt31 | # of blue<br>Ypt1 | # of puncta<br>co-loc of all<br>three | % of<br>Ypt1+Ypt31<br>with Sec7 |
|--------------------------------------------------|-----|------------------|---------------------|-------------------|---------------------------------------|---------------------------------|
| CEN<br>n=30                                      | ave | 4.43             | 6.03                | 5.67              | 1.07                                  | 0.92                            |
|                                                  | ±   | 0.05             | 0.24                | 0.38              | 0.09                                  | 0.03                            |
| CEN-Ypt1-GTP<br>n=30                             | ave | 4.63             | 6.33                | 5.97              | 1.60                                  | 0.93                            |
|                                                  | ±   | 0.05             | 0.00                | 0.52              | 0.28                                  | 0.04                            |
|                                                  |     |                  |                     |                   | <b>p=0.0350</b>                       |                                 |
| CEN-Ypt31-GTP<br>n=30                            | ave | 4.43             | 6.27                | 5.90              | 0.93                                  | 0.93                            |
|                                                  | ±   | 0.05             | 0.47                | 0.33              | 0.00                                  | 0.00                            |
|                                                  |     |                  |                     |                   | <b>p=0.5132</b>                       |                                 |

Bolded numbers were used for graphs in Figure S5B.



## Supplemental Experimental Procedures

### Yeast Strains

| NSY number | Alias                           | Genotype                                                                                                                     | Reference      |
|------------|---------------------------------|------------------------------------------------------------------------------------------------------------------------------|----------------|
| NSY862     | Cop1-mRFP                       | <i>mat alpha his3 delta1 leu2 delta 0 lys2 delta 0 ura3 delta 0 COP1::mRFP-kanMX6</i>                                        | 1              |
| NSY1733    | Cop1-mRFP Vrg4-yEGFP            | <i>NSY862 VRG4::yEGFP-nat</i>                                                                                                | this study     |
| NSY1734    | Cop1-mRFP Sec7-yEGFP            | <i>NSY862 SEC7::yEGFP-nat</i>                                                                                                | this study     |
| NSY1735    | Cop1-mRFP Chc1-GFP              | <i>NSY862 CHC1::GFP-hyg</i>                                                                                                  | this study     |
| NSY863     | Chc1-mRFP                       | <i>mat alpha his3 delta1 leu2 delta 0 lys2 delta 0 ura3 delta 0 CHC1::mRFP-kanMX6</i>                                        | 1              |
| NSY1736    | Chc1-mRFP Vrg4-yEGFP            | <i>NSY863 VRG4::yEGFP-nat</i>                                                                                                | this study     |
| NSY1737    | Chc1-mRFP Cop1-GFP              | <i>NSY863 COP1::GFP-hyg</i>                                                                                                  | this study     |
| NSY1738    | Chc1-mRFP Sec7-yEGFP            | <i>NSY863 SEC7::yEGFP-nat</i>                                                                                                | this study     |
| NSY825     | WT- BY4741                      | <i>mat a leu2 delta 0 ura3 delta 0 his3 delta 1 met15 delta 0</i>                                                            | 2              |
| NSY1739    | Sec7-mCherry                    | BY4741 SEC7::mCherry-NatR                                                                                                    | this study     |
| NSY1740    | Vrg4-yEGFP                      | BY4741 VRG4::yEGFP-NatR                                                                                                      | this study     |
| NSY1221    | yEGFP-Ypt31/ypt31Δ              | <i>mat alpha ade2 ura3-52 leu2-3,112 his3 delta 200 lys2 ypt32::kan yEGFP-Ypt31(LYS2) in Ypt31 locus</i>                     | this study     |
| NSY1741    | yEGFP-Ypt31/ypt31Δ<br>Sec7-mRFP | <i>mat alpha ade2 ura3-52 leu2-3,112 his3 delta 200 lys2 ypt32::kan yEGFP-Ypt31(LYS2) in Ypt31 locus<br/>SEC7::mRFP-HygR</i> | this study     |
| NSY1742    | Chc1-GFP                        | BY4741 CHC1::GFP-HygR                                                                                                        | this study     |
| NSY1743    | Chc1-GFP Sec7-mRFP              | BY4741 CHC1::GFP-HygR SEC7::mRFP-G418R                                                                                       | this study     |
| NSY1744    | Sec7-mRFP                       | BY4741 SEC7::mRFP-G418R                                                                                                      | this study     |
| NSY1745    | Cop1-GFP Sec7-mRFP              | BY4741 SEC7::mRFP-G418R COP1::GFP-HygR                                                                                       | this study     |
| NSY128     | WT- DBY4985                     | <i>mat alpha ade2 his3 delta 200 leu2-3,112 lys2-801 ura3-52</i>                                                             | David Botstein |
| NSY1746    | Chc1-GFP                        | NSY128 CHC1::GFP-HygR                                                                                                        | this study     |

|         |                                             |                                                                                                                              |            |
|---------|---------------------------------------------|------------------------------------------------------------------------------------------------------------------------------|------------|
| NSY1747 | Chc1-GFP Sec7-mRFP                          | NSY128 CHC1::GFP-HygR SEC7::mRFP-G418R                                                                                       | this study |
| NSY1748 | Cop1-GFP                                    | NSY128 COP1::GFP-HygR                                                                                                        | this study |
| NSY1749 | Cop1-GFP Sec7-mRFP                          | NSY128 COP1::GFP-HygR SEC7::mRFP-G418R                                                                                       | this study |
| NSY1541 | <i>ypt1Δ</i> + pRS316-Ypt1                  | NSY128 pRS316-YPT1 <i>ypt1Δ</i> ::HygR                                                                                       | 3          |
| NSY302  | <i>ypt31Δ/ypt32Δ</i><br>+ pRS316-Ypt31      | <i>mat alpha ade2 his3 delta 200 leu2-3 lys2 ura3-52<br/>deltaYPT31::HIS2 pRS316-Ypt31 deltaYPT32::KanR<br/>pRS316-Ypt31</i> | 4          |
| NSY220  | WT- YPT1                                    | <i>mat alpha ura3-52 lys2 his4</i>                                                                                           | 5          |
| NSY222  | <i>ypt1ts</i>                               | <i>mat alpha ura3-52 his4 ypt1A136D</i>                                                                                      | 5          |
| NSY125  | WT- YPT31/32                                | <i>mat a ura3-52 lys2 his4</i>                                                                                               | 6          |
| NSY348  | <i>ypt31Δ/ypt32ts</i>                       | <i>mat a ura3-52 lys2 his4-539 deltaYPT31::HIS3 ypt32-<br/>A141D</i>                                                         | 6          |
| NSY1750 | YPT1<br>Sec7-mRFP                           | NSY1081 SEC7::mRFP-G418R                                                                                                     | this study |
| NSY1754 | YPT1<br>Sec7-mRFP Cop1-GFP                  | NSY1081 SEC7::mRFP-G418R COP1::GFP-HygR                                                                                      | this study |
| NSY1756 | YPT1<br>Sec7-mRFP Chc1-GFP                  | NSY1081 SEC7::mRFP-G418R CHC1::GFP-HygR                                                                                      | this study |
| NSY1751 | <i>ypt1ts</i><br>Sec7-mRFP                  | NSY1082 SEC7::mRFP-G418R                                                                                                     | this study |
| NSY1758 | <i>ypt1ts</i><br>Sec7-mRFP Cop1-GFP         | NSY1082 SEC7::mRFP-G418R COP1::GFP-HygR                                                                                      | this study |
| NSY1760 | <i>ypt1ts</i><br>Sec7-mRFP Chc1-GFP         | NSY1082 SEC7::mRFP-G418R CHC1::GFP-HygR                                                                                      | this study |
| NSY1752 | YPT31/32<br>Sec7-mRFP                       | NSY125 SEC7::mRFP-G418R                                                                                                      | this study |
| NSY1762 | YPT31/32<br>Sec7-mRFP Cop1-GFP              | NSY125 SEC7::mRFP-G418R COP1::GFP-HygR                                                                                       | this study |
| NSY1764 | YPT31/32<br>Sec7-mRFP Chc1-GFP              | NSY125 SEC7::mRFP-G418R CHC1::GFP-HygR                                                                                       | this study |
| NSY1753 | <i>ypt31Δ/ypt32ts</i><br>Sec7-mRFP          | NSY348 SEC7::mRFP-G418R                                                                                                      | this study |
| NSY1766 | <i>ypt31Δ/ypt32ts</i><br>Sec7-mRFP Cop1-GFP | NSY349 SEC7::mRFP-G418R COP1::GFP-HygR                                                                                       | this study |
| NSY1768 | <i>ypt31Δ/ypt32ts</i><br>Sec7-mRFP Chc1-GFP | NSY350 SEC7::mRFP-G418R CHC1::GFP-HygR                                                                                       | this study |

## Plasmids

| <b>PNS number</b> | <b>Alias</b>      | <b>Genotype</b>                                    | <b>Reference</b>        |
|-------------------|-------------------|----------------------------------------------------|-------------------------|
| pNS245            | empty <i>CEN</i>  | pRS315 <i>CEN</i> , <i>LEU2</i> , Amp <sup>r</sup> | 7                       |
| pNS1430           | yEVenus-Ypt1      | pRS315-yEVenus- <i>YPT1</i>                        | 8                       |
| pNS1431           | mCherry-Ypt1      | pRS315-mCherry- <i>YPT1</i>                        | This study              |
| pNS1364           | <i>CEN</i> Ypt1   | pRS315- <i>YPT1</i>                                | 9                       |
| pNS661            | GFP-Ypt31         | pRS315-GFP- <i>YPT31</i>                           | Ruth Collins            |
| pNS221            | <i>CEN</i> Ypt31  | pRS315- <i>YPT31</i>                               | 4                       |
| pNS246            | empty <i>CEN</i>  | pRS316 <i>CEN</i> , <i>URA3</i> , Amp <sup>r</sup> | 7                       |
| pNS636            | <i>CEN</i> Ypt1   | pRS316- <i>YPT1</i>                                | Ruth Collins            |
| pNS220            | <i>CEN</i> Ypt31  | pRS316- <i>YPT31</i>                               | 4                       |
| pNS719            | empty <i>CEN</i>  | pRS317 <i>CEN</i> , <i>LYS2</i> , Amp <sup>r</sup> | 10                      |
| pNS939            | <i>CEN</i> Ypt31  | pRS317- <i>YPT31</i>                               | This study              |
| pNS994            | yEGFP-Ypt31       | pRS317-yEGFP- <i>YPT31</i>                         | This study              |
| pNS180            | empty 2 $\mu$     | pRS425 2 $\mu$ , <i>LEU2</i> , Amp <sup>r</sup>    | 7                       |
| pNS993            | 2 $\mu$ Ypt1      | YEp423- <i>YPT1</i> <i>LEU2</i>                    | 5                       |
| pNS1556           | 2 $\mu$ Ypt1-GTP  | YEp423- <i>YPT1Q67L</i>                            | This study              |
| pNS781            | 2 $\mu$ Ypt31     | pRS425- <i>Ypt31</i>                               | Scott Emr               |
| pNS782            | 2 $\mu$ Ypt31-GTP | pRS425- <i>YPT31Q72L</i>                           | Scott Emr               |
| pNS274            | empty 2 $\mu$     | YEp24 2 $\mu$ , <i>URA3</i> , Amp <sup>r</sup>     | New England Biolabs, MA |
| pNS489            | 2 $\mu$ Ypt1      | YEp24- <i>YPT1</i>                                 | 11                      |
| pNS229            | 2 $\mu$ Ypt31     | YEp24- <i>YPT31</i>                                | 6                       |

|         |                      |                                                                         |            |
|---------|----------------------|-------------------------------------------------------------------------|------------|
| pNS1527 | tagging plasmid      | pFA6a-mRFP-G418 <sup>r</sup>                                            | 1          |
| pNS1557 | tagging plasmid      | pFA6a-GFP-Hyg <sup>r</sup>                                              | This study |
| pNS1506 | tagging plasmid      | pKT127-yEGFP replaced with mCherry-G418r replaced with Nat <sup>r</sup> | 12         |
| pNS1533 | tagging plasmid      | pKT127-yEGFP-G418r replaced with Nat <sup>r</sup>                       | This study |
| pNS1558 | <i>CEN</i> Ypt1-GTP  | pRS315-YPT1Q67L                                                         | This study |
| pNS1559 | <i>CEN</i> Ypt31-GTP | pRS315-YPT31Q72L                                                        | This study |

### Plasmid construction

Plasmid for expression of mCherry-Ypt1 was constructed by sub-cloning mCherry to replace yEVENUS in pNS1430. pNS220 (pRS316-Ypt31) was described in (Jedd et al., 1997). pNS939 (pRS317-Ypt31) was made by sub-cloning the Ypt31 containing ClaI-XbaI fragment from pRS316-Ypt31 into pRS317. pNS939 (pRS317-yEGFP-Ypt31) was made as follows: first, PciI site was removed from the vector backbone and introduced upstream of Ypt31 by site-directed mutagenesis, then yEGFP was cloned in frame with Ypt31 using PciI. pNS993 was previously described (Liang et al., 2007). pNS1556 (Ypt1Q67L in a  $2\mu$  *LEU2*) was made by site-directed mutagenesis of pNS993. pNS1557 (pFA6a-GFP-HygR) was made by replacing G418R cassette with HygR cassette using BglIII and SacI sites. pNS1533 (pKT-yEGFP-NatR) was made by replacing G418R cassette with NatR cassette using BglIII and SacI sites. The *CEN* plasmids pNS1558 and pNS1559 were constructed by sub-cloning Ypt1Q67L and Ypt31Q72L from the  $2\mu$  plasmids pNS1556 and pNS782, respectively, using the SalI and XbaI sites of pNS245 (*CEN Leu2*).

### Yeast strain construction and growth

Golgi proteins were tagged on the chromosome at their C-termini with mRFP, GFP, mCherry, or yEGFP using a standard technique (Wach et al., 1997) using appropriate plasmids listed in the plasmid table. All GFP-tagged strains were checked to ensure that the tagged product is stable by using immuno-blot analysis and mouse monoclonal anti-GFP antibodies (Roche Diagnostics).

Media preparation and yeast culture growth were done as previously described (Segev and Botstein, 1987).

## Supplemental References

1. Huh WK, et al. (2003) Global analysis of protein localization in budding yeast" Nature vol. 425 16 Oct. 2003
2. Brachmann CB, et al. (1998) Designer deletion strains derived from *Saccharomyces cerevisiae* S288C: A useful set of strains and plasmids for PCR-mediated gene disruption and other applications. *Yeast* 14:115–132.
3. Lipatova Z, et al. (2013) Regulation of ER-phagy by a Ypt/Rab GTPase module. *MBoC* 24:3133-3144
4. Jedd G, et al. (1997) Two new Ypt GTPases are required for exit from the yeast trans-Golgi compartment. *JCB* 137:563-580
5. Liang Y, et al. (2007) The role of Trs65 in the Ypt/Rab guanine nucleotide exchange factor function of the TRAPP-II complex. *MBoC* 18:2533-2541
6. Jones S, et al. (1999) Genetic interactions in yeast between Ypt GTPases and Arf guanine nucleotide exchangers. *Genetics* 152:1543-1556
7. Sikorski RS, Hieter P. (1989) A system of shuttle vectors and yeast host strains designed for efficient manipulation of DNA in *Saccharomyces cerevisiae*. *Genetics* 122:19–27.
8. Taussig D, et al. (2013) Trs20 is required for TRAPP-II assembly. *Traffic* 14:678-690
9. Lipatova Z, et al. (2011) Regulation of selective autophagy onset by a Ypt/Rab GTPase module. *PNAS* 109:18:6981-6986
10. Eriksson P, et al (2004) pRS yeast vectors with a LYS2 marker. *Biotechniques* 36:212–213
11. Morozova N, et al. (2006) TRAPP-II subunits are required for the specificity switch of a Ypt-Rab GEF. *Nat Cell Biol* 8:1263–1269.
12. Lipatova Z, Segev N. (2015) A Role for Macro-ER-Phagy in ER Quality Control. *PLoS Genet.* 11(7):e1005390
13. Segev et al. (1987) The ras-like yeast YPT1 gene is itself essential for growth, sporulation, and starvation response. *Mol Cell Biol* 7(7):2367-77
